# Supplementary material
Source: PubMed Central journal article supplement (PMC3324807)
Supplement: 10.3163.1536-5050.100.2.013.sg001.pdf [file 10.3163.1536-5050.100.2.013.sg001.pdf]

## Does Bradford's Law predict the size of the literature in Cochrane reviews?

Charlotte E. Nash-Stewart, MBBS; Lisa M., MBIT; Chris B. Del Mar, MD

**Table 1**

Distribution of literature on the treatment of acute otitis media and pneumonia from a 2006 search of Cochrane Reviews

|                               | Acute otitis media |                 | Pneumonia |                 |
|-------------------------------|--------------------|-----------------|-----------|-----------------|
|                               | Articles*          | Source journals | Articles* | Source journals |
| Zone 1: Core                  | 41                 | 5               | 69        | 6               |
| Zone 2: Middle                | 41                 | 15              | 87        | 21              |
| Zone 3: Tail                  | 53                 | 53              | 95        | 83              |
| Total                         | 135                | 73              | 251       | 110             |
| Bradford multiplier, <i>n</i> |                    | 3               |           | 3.5             |

\* In order to keep all journals that produced the same number of papers in the same zone, article distribution was not exactly in thirds.
